# Supplementary material
Source: PubMed Central journal article supplement (PMC10668597)
Supplement: NIHMS1944090-supplement-2.pdf [file NIHMS1944090-supplement-2.pdf]

## ■ ASSOCIATED CONTENT

### 📄 Supporting Information

The Supporting Information is available free of charge on the [ACS Publications website](#) at DOI: [10.1021/jacs.8b00196](https://doi.org/10.1021/jacs.8b00196).

Materials and instrumentation, sample preparation procedures, NMR spectroscopy screening and titration data, ITC data, CPC determinations, error analysis, select correlations with physical data, kinetic determinations of precipitation, and DLS data ([PDF](#))
